# Supplementary material
Source: PubMed Central journal article supplement (PMC4050597)
Supplement: 1402369111_pnas.201402369SI.pdf [file 1402369111_pnas.201402369SI.pdf]

# Supporting Information

Kent et al. 10.1073/pnas.1402369111

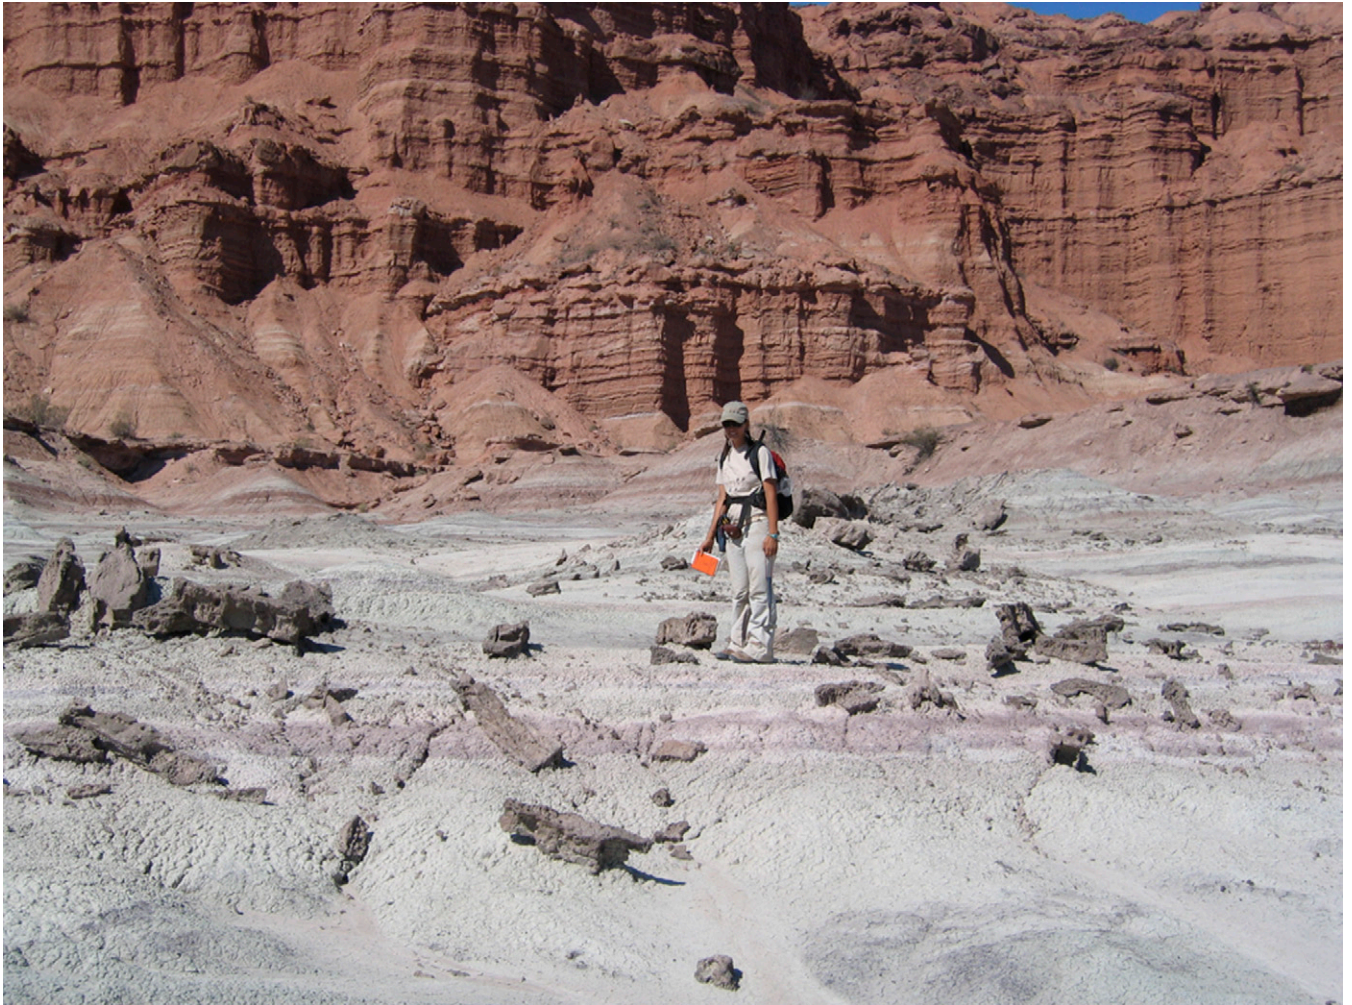

**Fig. S1.** Gradational contact between mauve-colored floodplain and fluvial sandstones and overbank mudstones of the Ischigualasto Formation (lower half of photo) to the predominantly red fluvial siltstones and sandstones of the overlying Los Colorados Formation (cliffs in background) near outlet of Quebrada de la Sal and the base of the sampled section of the Los Colorados Formation.



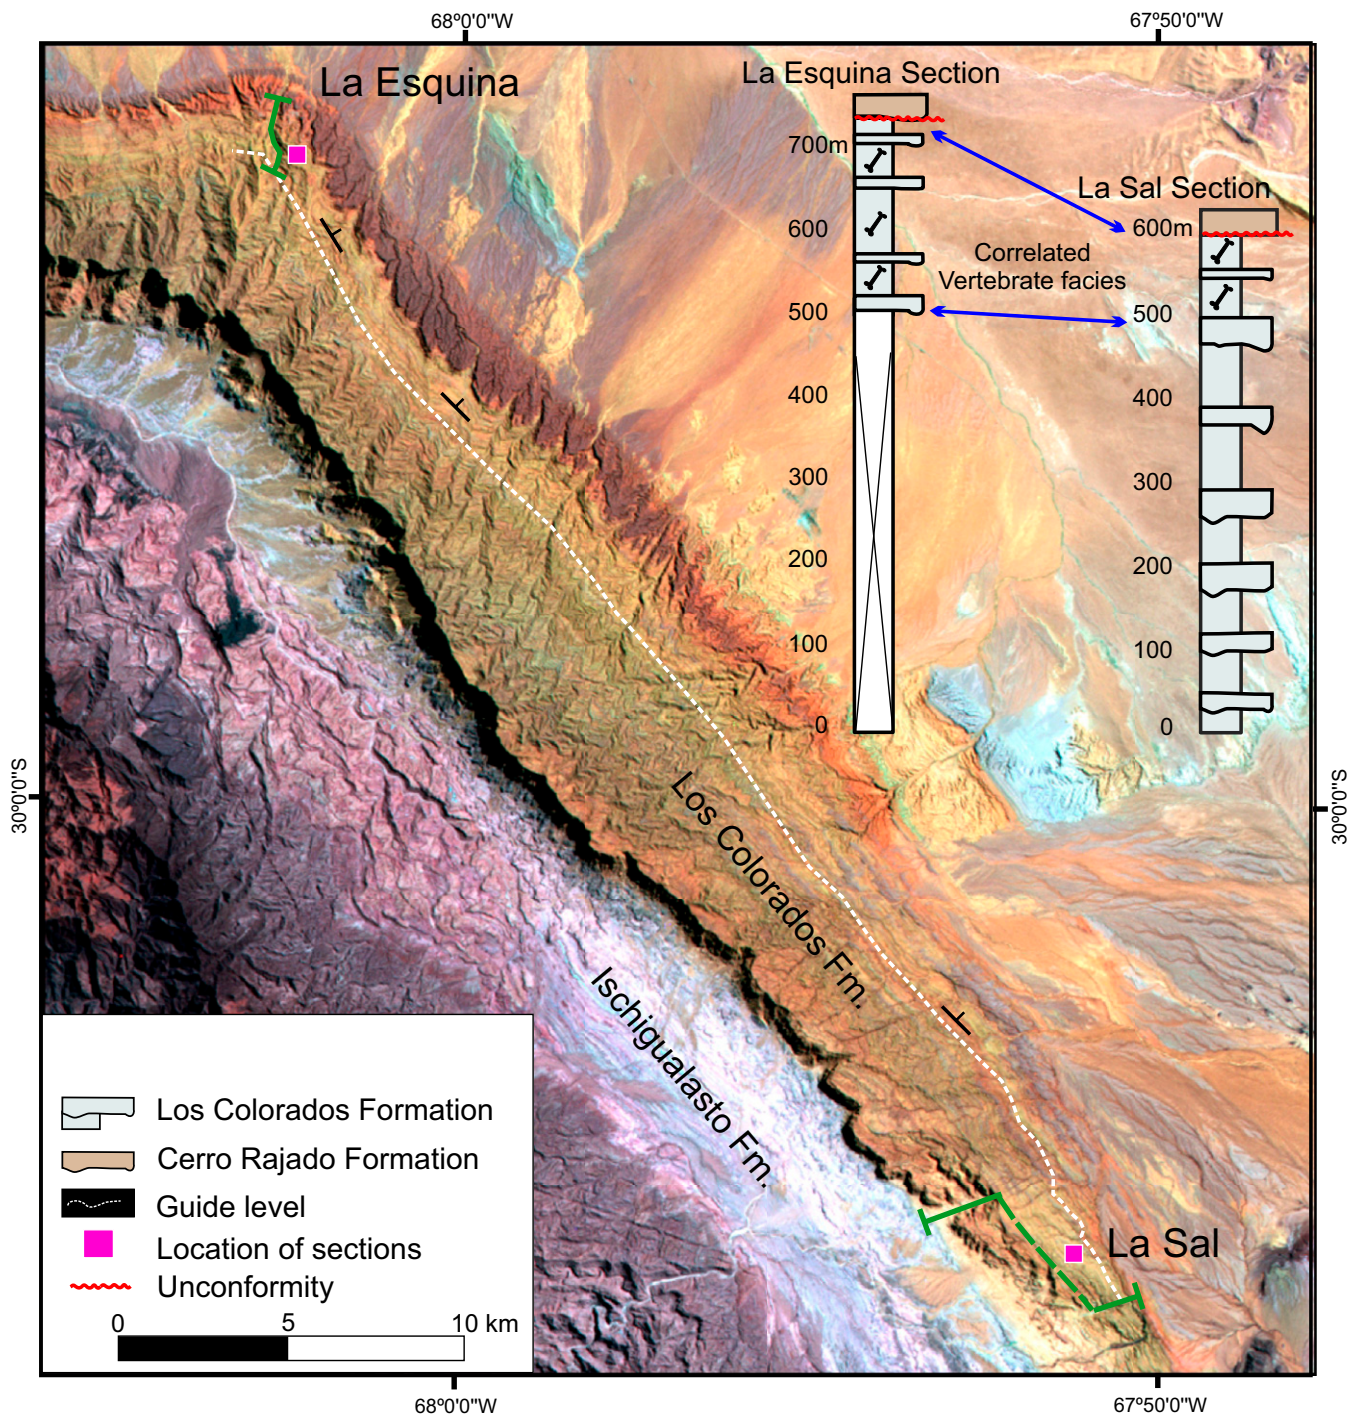

Fig. S2. Satellite image of the southern Ischigualasto-Villa Union Basin showing the continuity of exposures of the Los Colorados Formation between the La Sal section (green lines, dashed where the two subsections were linked), where the paleomagnetic sampling was done, and the La Esquina section (green line), where the La Esquina local fauna was defined. The dashed white line highlights the guide level used to correlate the sections. Lithostratigraphic profiles of each section with dominant sandstone bodies jutting out and finer-grained sediments recessed are shown in the upper right to illustrate how the vertebrate host sedimentary facies were identified and related in both sections, as well as the unconformable contact with Cerro Rajado Formation.

**Table S1. Site-mean and formation-mean ChRM directions and corresponding VGPs for La Sal section of the Los Colorados Formation in the Ischigualasto–Villa Union basin (30°S, 68°W)**

| Height (m) | ID   | n | k    | ChRM    |         | VGP     |         | rLat (°) | Magzone |
|------------|------|---|------|---------|---------|---------|---------|----------|---------|
|            |      |   |      | Dec (°) | Inc (°) | Lon (°) | Lat (°) |          |         |
| 10         | TIBH | 3 | 33   | 199.2   | 66.2    | 259.2   | -66.3   | -83.8    | LC1r    |
| 21         | TIBI | 3 | 56   | 2.3     | -51.5   | 70.1    | 87.1    | 74.7     | LC2n    |
| 30         | TIBJ | 3 | 27   | 21.3    | -49.7   | 29.0    | 71.6    | 77.1     | LC2n    |
| 50         | TIEA | 2 | 11   | 217.2   | 61.8    | 236.1   | -57.7   | -74.7    | LC2r    |
| 57         | TIBL | 2 | 210  | 200.1   | 67.0    | 260.0   | -65.2   | -82.6    | LC2r    |
| 68         | TIBM | 1 | 1    | 162.6   | 34.3    | 53.3    | -70.7   | -52.9    | LC2r    |
| 76         | TIBN | 2 | 75   | 222.8   | 51.9    | 217.3   | -53.6   | -66.8    | LC2r    |
| 80         | TIEQ | 2 | 8    | 247.4   | 61.7    | 235.5   | -35.7   | -53.1    | LC2r    |
| 84         | TIBO | 1 | 1    | 193.1   | 56.4    | 238.0   | -77.1   | -83.7    | LC2r    |
| 94         | TIBP | 2 | 33   | 201.5   | 54.1    | 221.9   | -71.3   | -80.9    | LC2r    |
| 104        | TIBQ | 2 | 500  | 209.8   | 70.2    | 259.1   | -57.7   | -75.5    | LC2r    |
| 115        | TIBR | 1 | 1    | 47.6    | -59.7   | 50.7    | 50.2    | 66.6     | LC3n    |
| 125        | TIBS | 3 | 65   | 17.6    | -56.3   | 51.7    | 73.8    | 84.0     | LC3n    |
| 136        | TIBT | 3 | 76   | 197.4   | 61.1    | 247.8   | -71.5   | -89.0    | LC3r    |
| 145        | TIBU | 3 | 291  | 202.9   | 62.3    | 245.1   | -67.3   | -85.1    | LC3r    |
| 155        | TIBV | 2 | 5    | 180.5   | 52.5    | 284.3   | -86.9   | -74.3    | LC3r    |
| 165        | TIBW | 1 | 1    | 181.2   | 61.6    | 288.0   | -77.2   | -78.9    | LC3r    |
| 172        | TIEP | 2 | 176  | 38.0    | -64.6   | 62.1    | 56.4    | 74.1     | LC4n    |
| 180        | TICA | 2 | 19   | 11.5    | -62.5   | 81.7    | 73.4    | 86.3     | LC4n    |
| 196        | TICB | 1 | 1    | 9.3     | -63.4   | 88.5    | 73.3    | 84.5     | LC4n    |
| 206        | TICC | 2 | 467  | 170.8   | 74.9    | 300.2   | -57.8   | -65.8    | LC4r    |
| 215        | TICD | 1 | 1    | 358.7   | -31.7   | 286.4   | 77.1    | 60.4     | LC5n    |
| 228        | TICE | 1 | 1    | 213.3   | 60.9    | 235.3   | -60.8   | -77.4    | LC5r    |
| 243        | TICF | 3 | 56   | 227.9   | 61.9    | 234.7   | -50.0   | -67.0    | LC5r    |
| 252        | TICG | 4 | 21   | 231.6   | 67.1    | 244.4   | -46.8   | -64.8    | LC5r    |
| 270        | TICH | 2 | 11   | 203.8   | 55.9    | 226.3   | -69.1   | -81.5    | LC5r    |
| 298        | TICK | 2 | 92   | 153.5   | 67.2    | 329.4   | -61.8   | -60.0    | LC5r    |
| 299        | TIET | 1 | 1    | 227.0   | 60.7    | 232.5   | -50.7   | -67.4    | LC5r    |
| 309        | TICL | 2 | 549  | 103.7   | 81.8    | 310.6   | -32.5   | -40.0    | LC5r    |
| 323        | TICM | 2 | 10   | 186.4   | 30.7    | 136.9   | -75.3   | -62.5    | LC5r    |
| 332        | TICN | 2 | 131  | 174.8   | 51.4    | 355.9   | -85.1   | -70.0    | LC5r    |
| 344        | TICO | 2 | 22   | 26.1    | -66.4   | 72.9    | 62.7    | 80.8     | LC6n    |
| 362        | TICQ | 2 | 58   | 2.2     | -63.5   | 106.1   | 74.8    | 79.6     | LC6n    |
| 371        | TICR | 2 | 23   | 0.4     | -52.5   | 105.8   | 86.9    | 74.2     | LC6n    |
| 381        | TICS | 2 | 338  | 6.0     | -57.5   | 82.2    | 80.5    | 80.9     | LC6n    |
| 388        | TICT | 1 | 1    | 25.8    | -52.8   | 37.5    | 67.8    | 78.0     | LC6n    |
| 406        | TICU | 2 | 35   | 160.1   | 59.3    | 344.7   | -70.9   | -62.9    | LC6r    |
| 414        | TICV | 1 | 1    | 155.4   | 40.4    | 33.7    | -67.0   | -51.0    | LC6r    |
| 416        | TIEB | 2 | 186  | 35.9    | -64.2   | 61.9    | 57.9    | 75.6     | LC7n    |
| 427        | TICW | 3 | 66   | 21.7    | -54.3   | 42.5    | 71.1    | 81.0     | LC7n    |
| 435        | TICX | 2 | 77   | 350.4   | -60.8   | 142.6   | 75.9    | 70.9     | LC7n    |
| 444        | TICY | 2 | 345  | 39.2    | -64.2   | 60.8    | 55.7    | 73.4     | LC7n    |
| 454        | TICZ | 2 | 6    | 15.6    | -33.9   | 346.7   | 71.8    | 65.8     | LC7n    |
| 462        | TIEC | 2 | 2    | 343.8   | -63.9   | 146.6   | 69.9    | 66.7     | LC7n    |
| 480        | TIEE | 2 | 390  | 214.9   | 58.3    | 229.0   | -60.1   | -75.5    | LC7r    |
| 494        | TIEF | 2 | 2950 | 217.3   | 66.8    | 247.3   | -55.9   | -74.0    | LC7r    |
| 505        | TIEG | 2 | 259  | 207.6   | 62.3    | 241.5   | -64.2   | -81.7    | LC7r    |
| 525        | TIEH | 2 | 12   | 348.0   | -45.4   | 215.5   | 79.0    | 62.1     | LC8n    |
| 531        | TIEI | 2 | 217  | 45.9    | -63.8   | 58.5    | 51.2    | 68.7     | LC8n    |
| 544        | TIEJ | 2 | 243  | 11.0    | -60.3   | 76.6    | 75.7    | 85.8     | LC8n    |
| 551        | TIEK | 2 | 427  | 31.4    | -61.3   | 57.0    | 62.0    | 78.9     | LC8n    |
| 564        | TIEL | 2 | 590  | 19.8    | -75.3   | 96.0    | 55.2    | 70.3     | LC8n    |

Mean characteristic remanent magnetization (ChRM) direction (52 sites):  $D = 15.4^\circ$ ,  $I = -60.4^\circ$  ( $A95 = 3.8^\circ$ ). Mean virtual geomagnetic pole (VGP) position (52 sites): Longitude (Lon) =  $70.8^\circ\text{E}$ , Latitude (Lat) =  $71.8^\circ\text{N}$  ( $A95 = 5.0^\circ$ ). Sampling level in stratigraphic height in meters from base of Los Colorados Formation for each sampling site (ID) at which a ChRM was isolated in number of samples (n) with a Fisher precision parameter (k; assigned 1 for only one sample) for mean direction (Dec, declination; Inc, inclination) in bedding coordinates and corresponding VGP position. rLat is latitude of VGP with respect to mean paleomagnetic north pole; Magzone is magnetic polarity zone where suffix n is for normal polarity and r is for reverse polarity. A95 is radius of circle of 95% confidence about the mean direction.
